# Supplementary figures and images for: Expression and biological significance of c-FLIP in human hepatocellular carcinomas
Source: Springer Nature journal article supplement (doi:10.1186/1756-9966-28-24), 2009-02-01

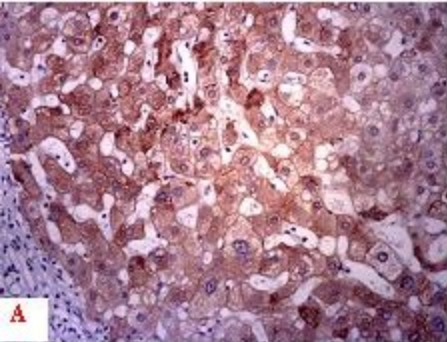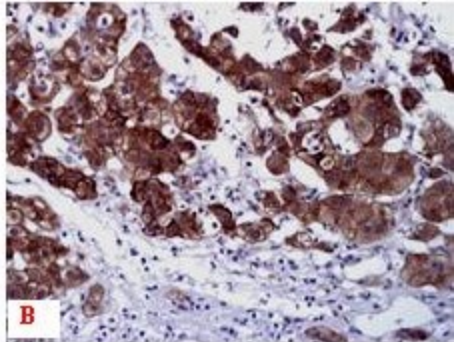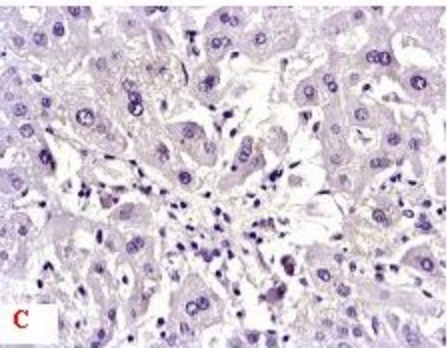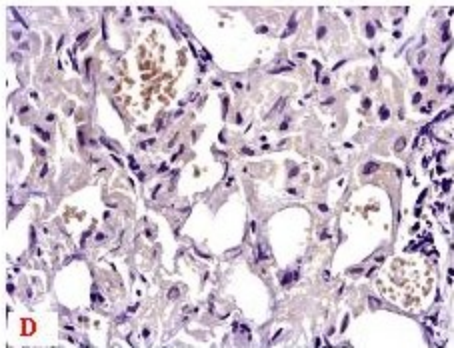

Supplement: 13046_2008_111_MOESM1_ESM.pdf [file 13046_2008_111_MOESM1_ESM.pdf]

## Comparison of survival curves

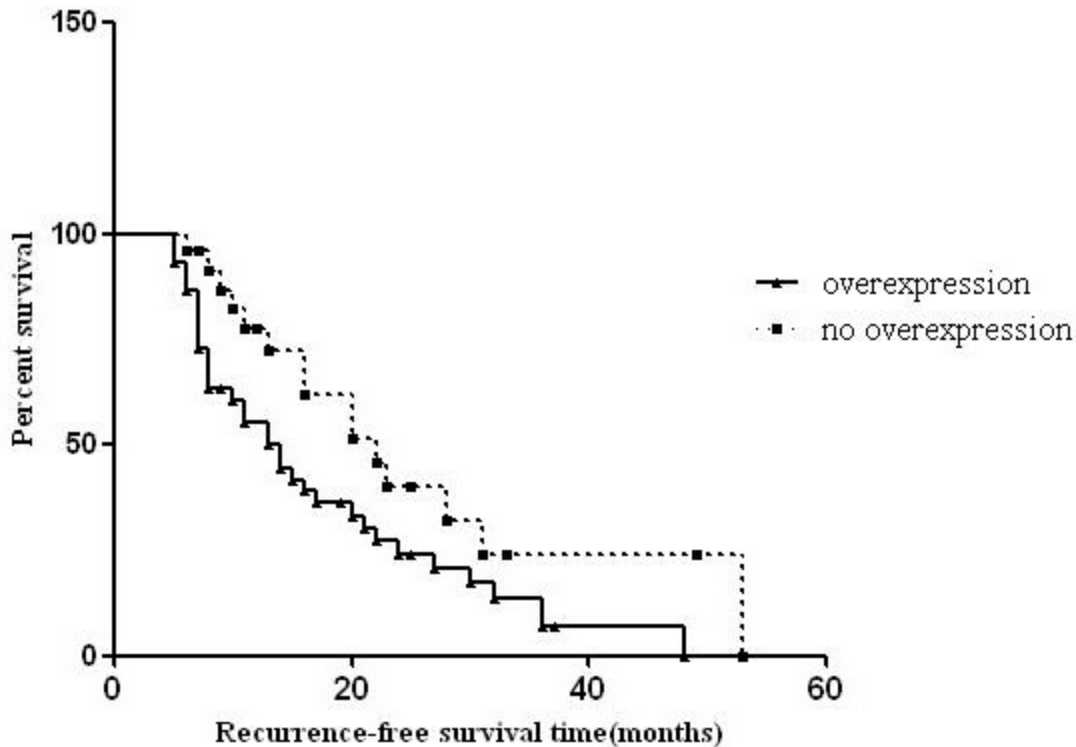

Supplement: 13046_2008_111_MOESM2_ESM.pdf [file 13046_2008_111_MOESM2_ESM.pdf]
